# Supplementary material for: Enhanced Cd-Accumulation in Typha latifolia by Interaction with Pseudomonas rhodesiae GRC140 under Axenic Hydroponic Conditions
Source: MDPI journal article supplement (doi:10.3390/plants11111447), 2022-05-29
Supplement: s1 [file s1]

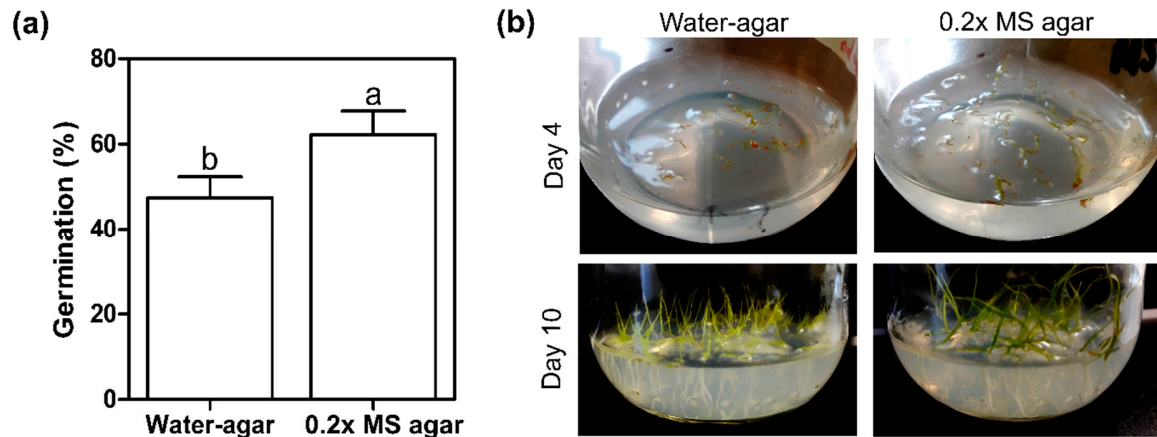

**Figure S1.** *Typha latifolia* seeds germination. (a) Germination percentage in different culture media after four incubation days, (b) Germinated seeds on water-agar medium and 0.2× MS agar after four and ten incubation days. The values represent the mean  $\pm$  SD ( $n = 3$ ). Different letters represent statistically different means ( $p < 0.05$ , Tukey's test).
